# Supplementary material for: Fat-to-Muscle Ratios and the Non-Achievement of LDL Cholesterol Targets: Analysis of the Korean Genome and Epidemiology Study
Source: MDPI journal article supplement (doi:10.3390/jcdd8080096), 2021-08-12
Supplement: s1 [file s1]

Table S1. Number of participants taking anti-dyslipidemic medications according to the tertiles of fat-to-muscle ratio.

| Fat-to-muscle ratio                                      | Men          |                  |              |          | Women        |                  |              |          |
|----------------------------------------------------------|--------------|------------------|--------------|----------|--------------|------------------|--------------|----------|
|                                                          | T1 (< 0.241) | T2 (0.242–0.314) | T3 (> 0.314) | <i>p</i> | T1 (< 0.439) | T2 (0.439–0.527) | T3 (> 0.527) | <i>p</i> |
| Participants taking anti-dyslipidemic medications, n (%) |              |                  |              |          |              |                  |              |          |
| Baseline                                                 | 0 (0.0%)     | 3 (1.2%)         | 3 (1.1%)     | 0.304    | 0 (0.0%)     | 1 (0.2%)         | 3 (0.7%)     | 0.238    |
| 1 <sup>st</sup> f/u                                      | 1 (0.8%)     | 0 (0.0%)         | 1 (0.6%)     | 0.608    | 0 (0.0%)     | 2 (0.9%)         | 8 (2.6%)     | 0.032    |
| 2 <sup>nd</sup> f/u                                      | 3 (0.6%)     | 2 (0.4%)         | 6 (1.2%)     | 0.307    | 4 (0.6%)     | 1 (0.2%)         | 10 (1.6%)    | 0.014    |
| 3 <sup>rd</sup> f/u                                      | 5 (1.1%)     | 4 (0.8%)         | 7 (1.4%)     | 0.689    | 3 (0.5%)     | 12 (2.0%)        | 9 (1.5%)     | 0.072    |
| 4 <sup>th</sup> f/u                                      | 2 (0.4%)     | 5 (1.0%)         | 17 (3.6%)    | <0.001   | 15 (2.4%)    | 24 (3.9%)        | 29 (4.8%)    | 0.070    |
| 5 <sup>th</sup> f/u                                      | 16 (3.6%)    | 11 (2.5%)        | 28 (6.1%)    | 0.022    | 33 (5.4%)    | 46 (7.9%)        | 44 (7.8%)    | 0.163    |
| 6 <sup>th</sup> f/u                                      | 21 (4.8%)    | 26 (6.0%)        | 41 (9.5%)    | 0.018    | 57 (9.7%)    | 89 (15.1%)       | 80 (14.8%)   | 0.008    |

*p* derived from chi-square test or Fisher's exact test.

*p* <0.05 considered statistically significant.
